# Supplementary material for: Monocytes/Macrophages play a pathogenic role in IL-23 mediated psoriasis-like skin inflammation
Source: PubMed Central journal article supplement (PMC6441056; doi:10.1038/s41598-019-41655-7), 2019-03-29
Supplement: 41598_2019_41655_MOESM2_ESM.pdf [file 41598_2019_41655_MOESM2_ESM.pdf]

**TITLE:**

Monocytes/Macrophages play a pathogenic role in IL-23 mediated psoriasis-like skin inflammation

**AUTHORS:**

Yibing Wang, Rebecca Edelmayer, Joe Wetter, Katherine Salte, Donna Gauvin, Laura Leys, Stephanie Paulsboe, Zhi Su, Isaac Weinberg, Marian Namovic, Stephen B. Gauld, Prisca Honore, Victoria E. Scott, Steve McGaraughty

**Supplementary Figure 1**  
**Ly6C<sup>hi</sup>MHC II<sup>hi</sup> macrophages increased over time compared to other CD64<sup>+</sup> Mon/Mac subsets in IL-23 mediated skin inflammation**

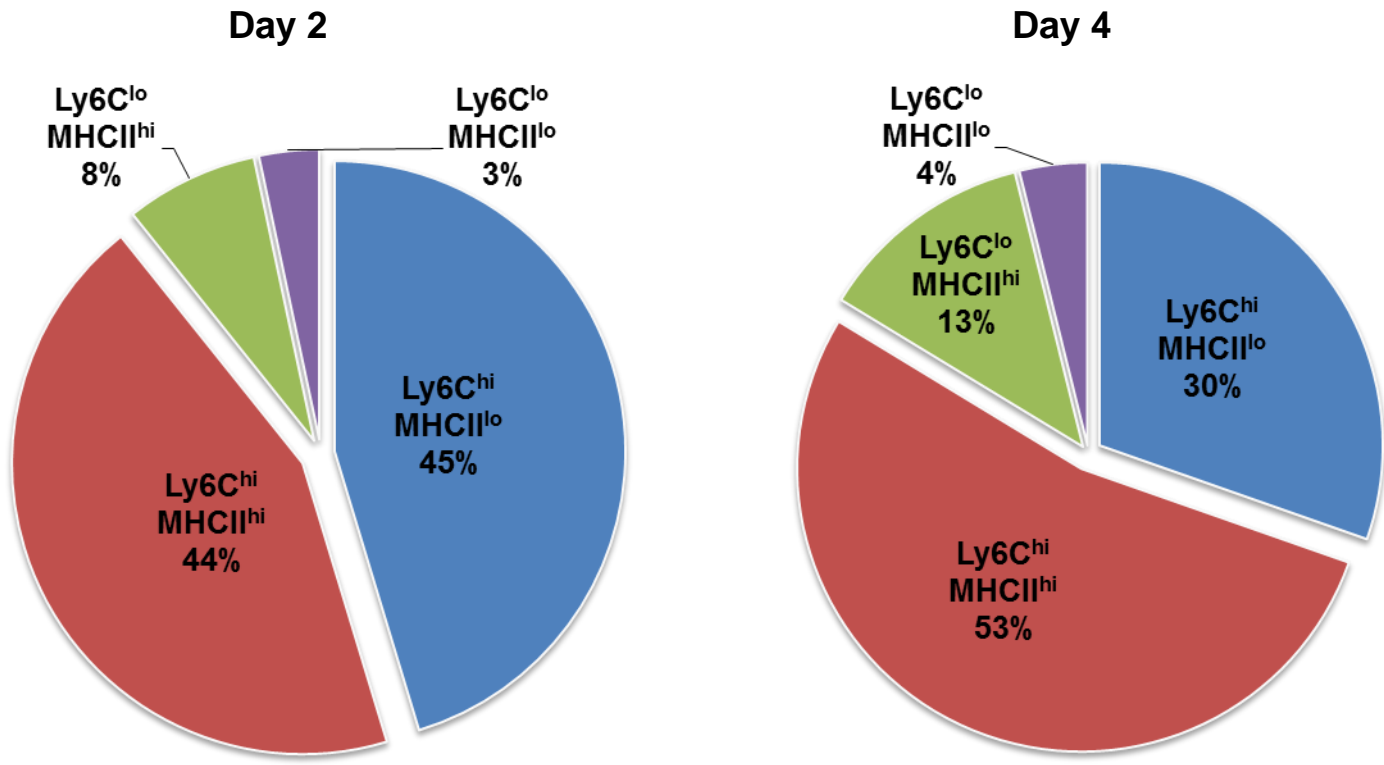

# Supplementary Figure 2

## Flow cytometry gating hierarchy for identifying Mon/Mac subpopulations by surface expression of lineage antigens

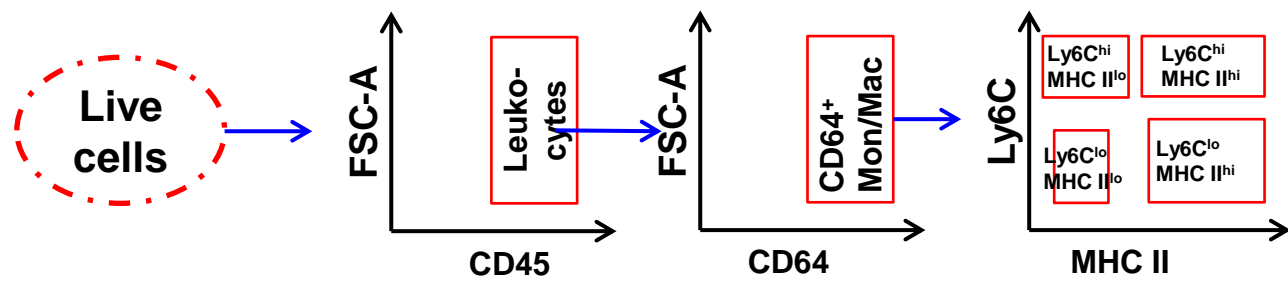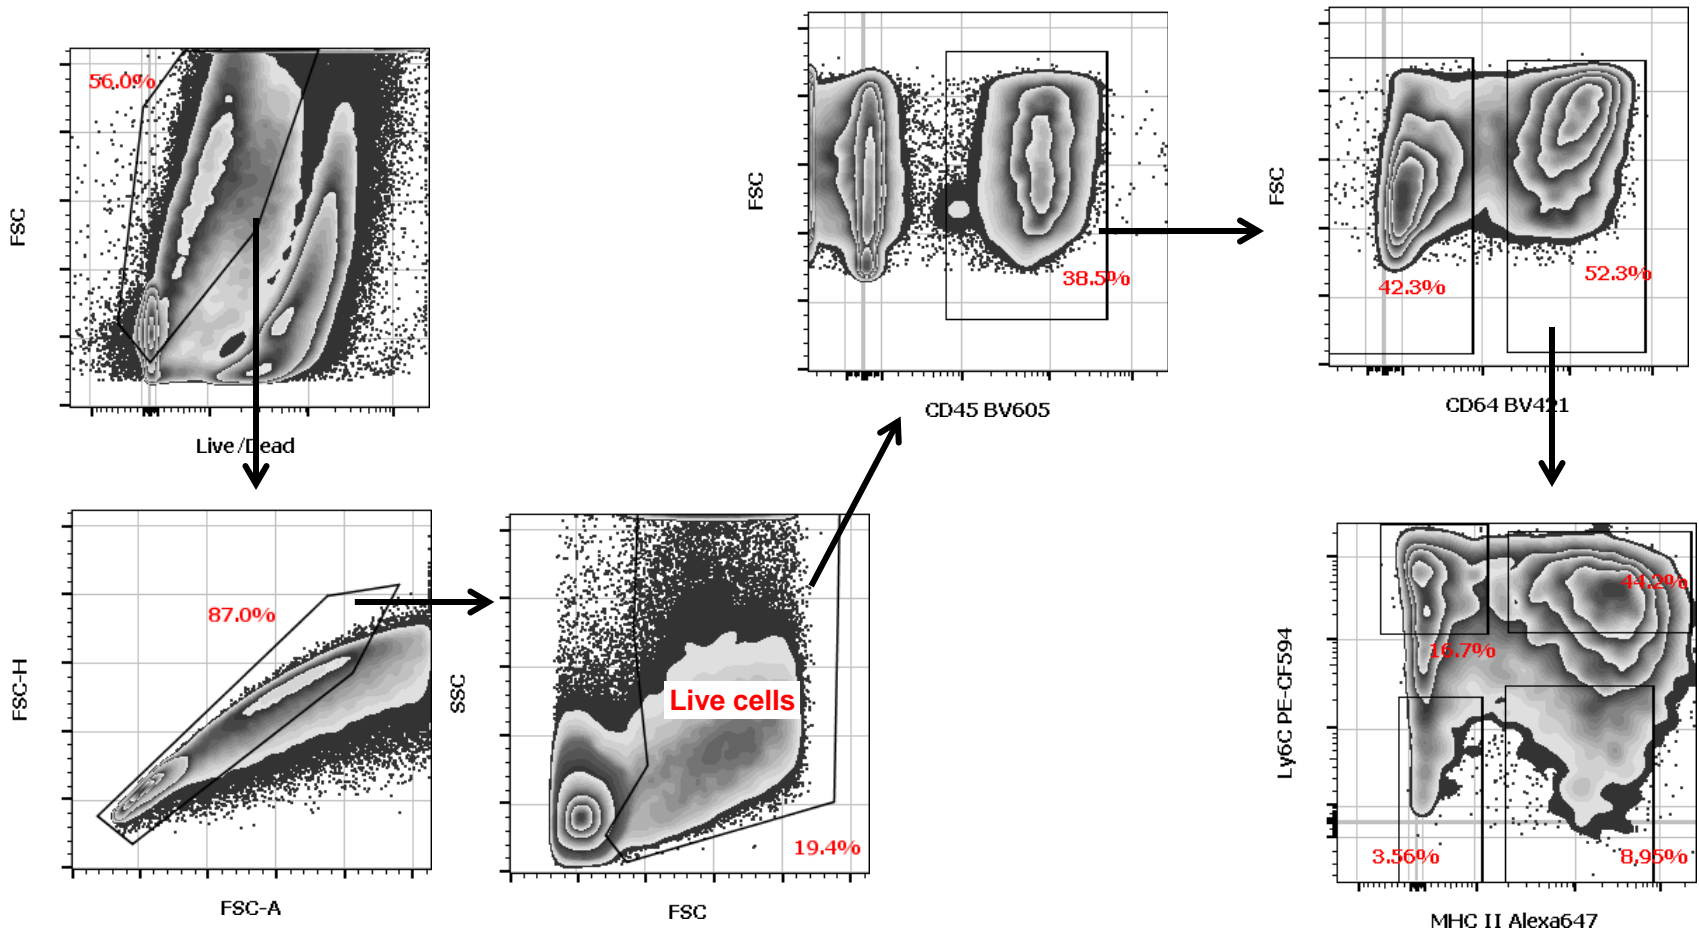

# Supplementary Figure 3

## Flow cytometry gating hierarchy of cellular populations for assessment of intracellular protein expression

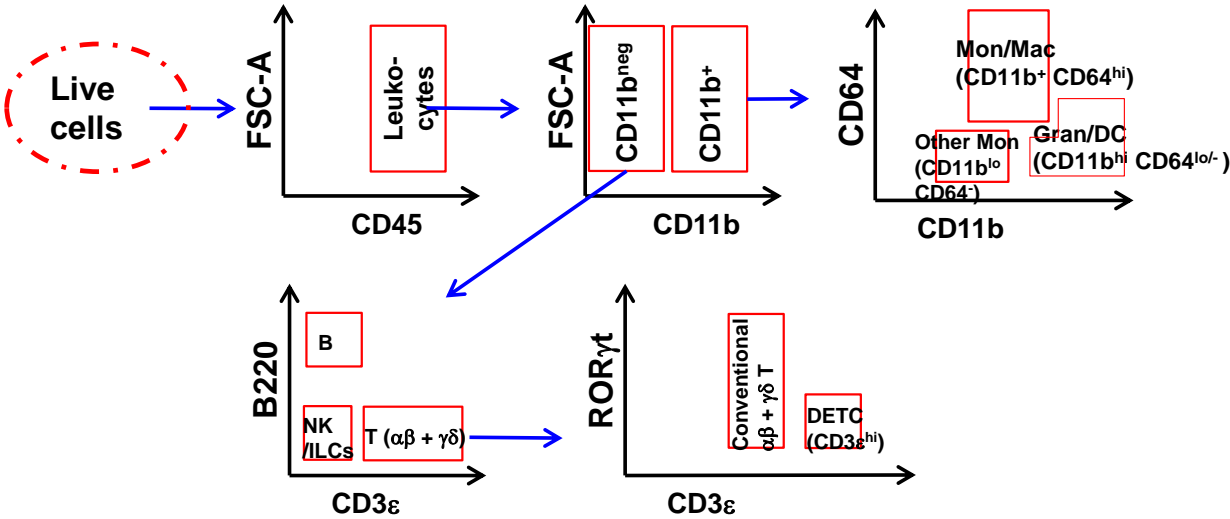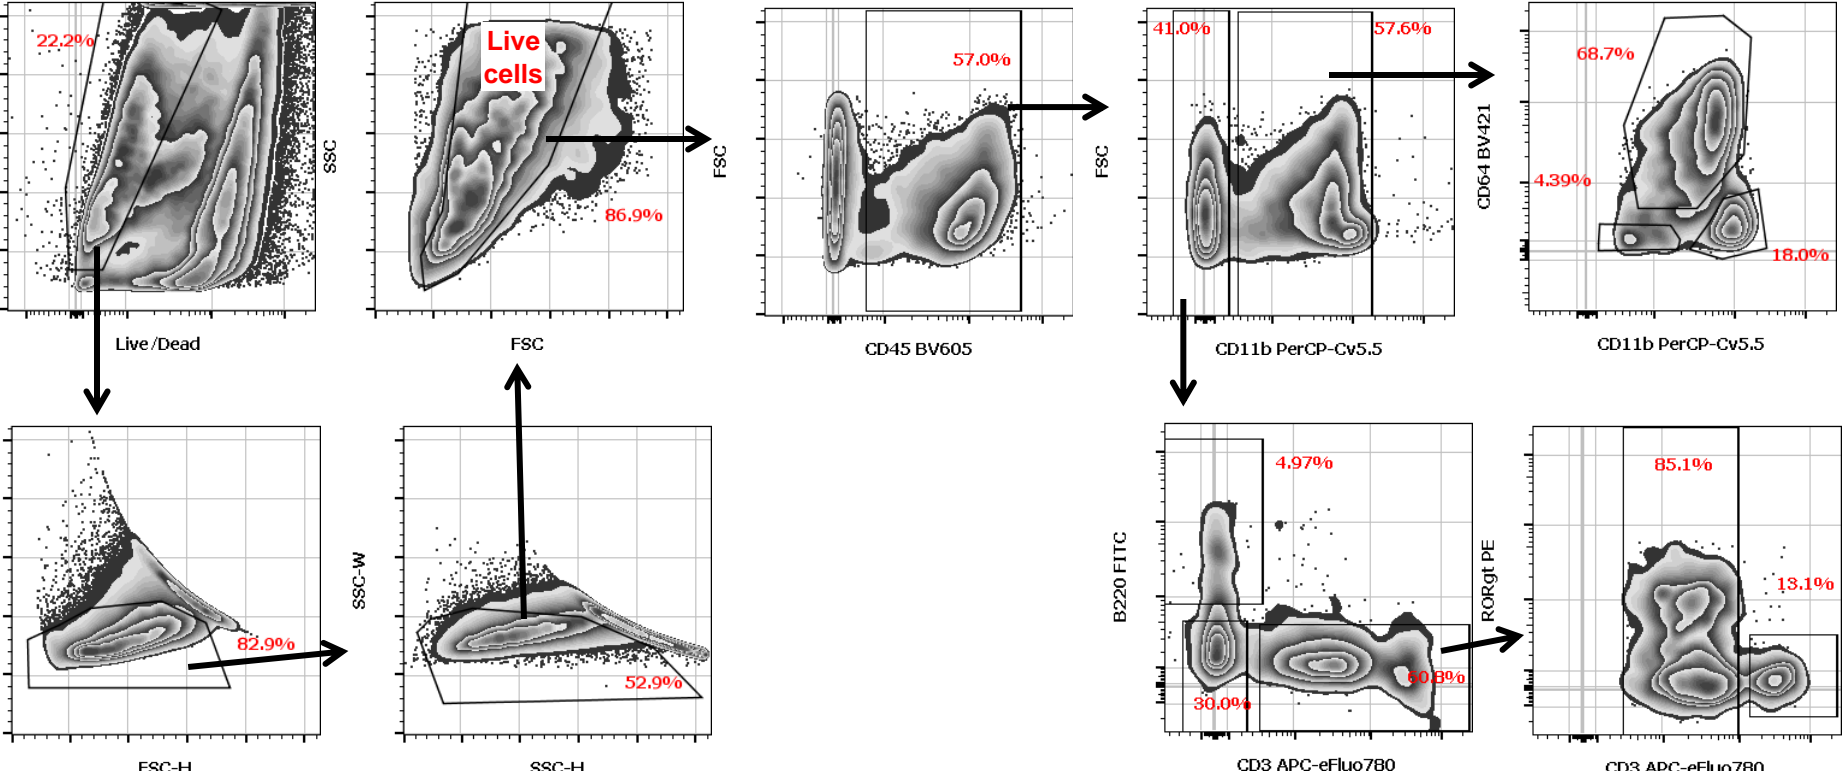

**Supplementary Figure 4**  
**TNF $\alpha$  and IL-17A expression in Granulocytes/Dendritic cell subsets were not elevated by IL-23 mediated skin inflammation**

**Gran/DC (neutrophils as majority)**  
**(Live>CD45<sup>+</sup>>CD11b<sup>+</sup>>CD11b<sup>hi</sup>CD64<sup>lo/-</sup>)**

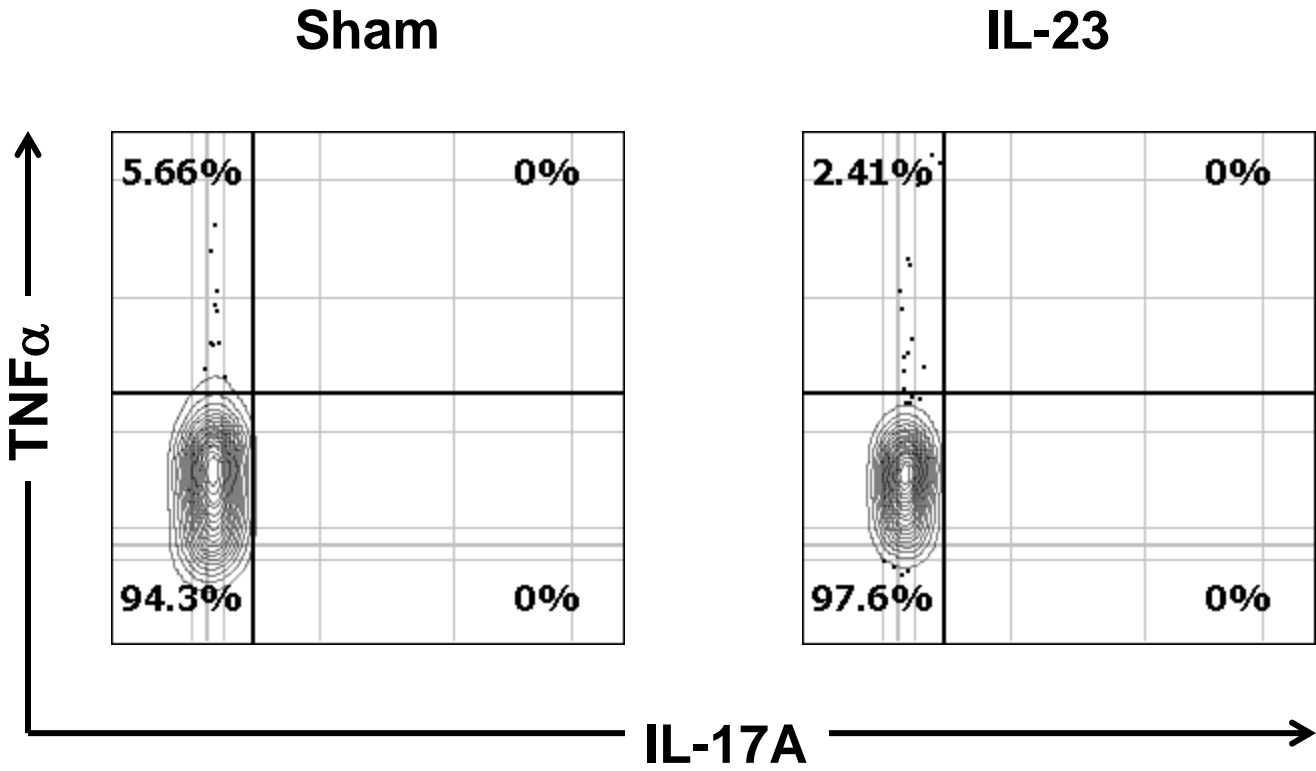

## Supplementary Figure 5

IL-23 induced ear skin inflammation with increased accumulation of Mon/Mac and T cells

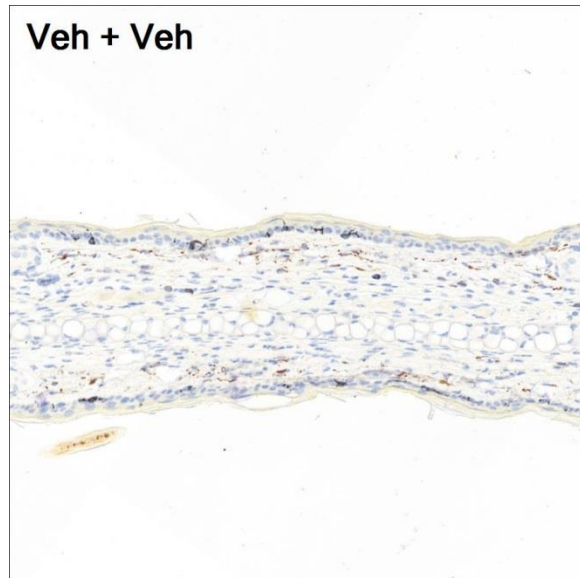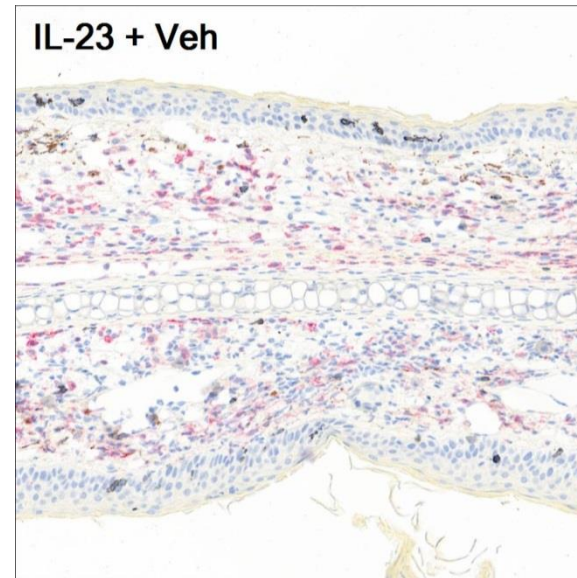

Red: IBA<sup>+</sup>

Black: CD3<sup>+</sup>
